# Supplementary material for: Ultralow voltage operation and microwatt power consumption of MXene-based pressure sensors with excellent sensing performance
Source: Royal Society of Chemistry journal article supplement (doi:10.1039/d4ta08386e), 2025-01-01
Supplement: d4ta08386e4.pdf [file d4ta08386e4.pdf]

## **Ultralow voltage operation and microwatt power consumption MXene based pressure sensors with excellent sensing performance**

Jiangtao Chen,<sup>a\*</sup> Yarong Zhou,<sup>a</sup> Tiancheng Song,<sup>a</sup> Xinyi Wang,<sup>a</sup> Ting Wang,<sup>a, b</sup> Yun Zhao,<sup>a</sup> Bingjun Yang,<sup>b\*</sup> Jianbiao Chen,<sup>a</sup> Yi Zhang,<sup>c\*</sup> Yan Li<sup>a</sup>

<sup>a</sup>Key Laboratory of Atomic and Molecular Physics & Functional Materials of Gansu Province, College of Physics and Electronic Engineering, Northwest Normal University, Lanzhou 730070, China

<sup>b</sup>Research Center of Resource Chemistry and Energy Materials, State Key Laboratory of Solid Lubrication, Lanzhou Institute of Chemical Physics, Chinese Academy of Sciences, Lanzhou 730000, China

<sup>c</sup>Department of Physics, Shanghai Normal University, Shanghai 200234, China

\*Corresponding authors.

E-mail: chenjt@nwnu.edu.cn (JTC); yangbj@licp.cas.cn (BJY); yzhang@shnu.edu.cn (YZ)

### **The file includes**

**Figure S1** Digital image of the MXene/PDMS composites.

**Figure S2** Digital image of the Au interdigital electrode on PET substrate, the electrode composes of Cu/Ni/Au three layers from bottom to the top.

**Figure S3** I-V curve of MXene/PDMS piezoresistive sensor without pressure applied.

**Figure S4** I-V curve of MXene/PDMS piezoresistive sensor under the pressure of 436 kPa.

**Figure S5** Resistance change curve of MXene/PDMS piezoresistive sensor under continuous pressure applied from 0 to 436 kPa.

**Figure S6** Response curve of MXene/PDMS piezoresistive sensor.

**Figure S7** International Morse code table.

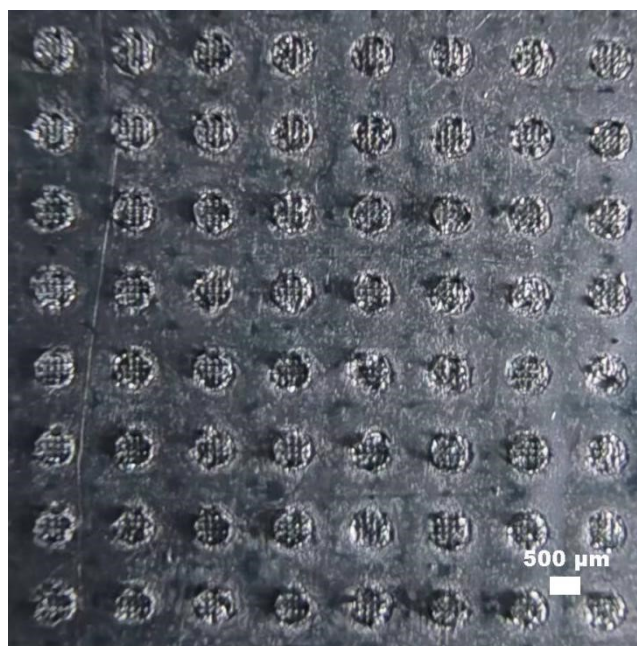

**Figure S1** Digital image of the MXene/PDMS composites.

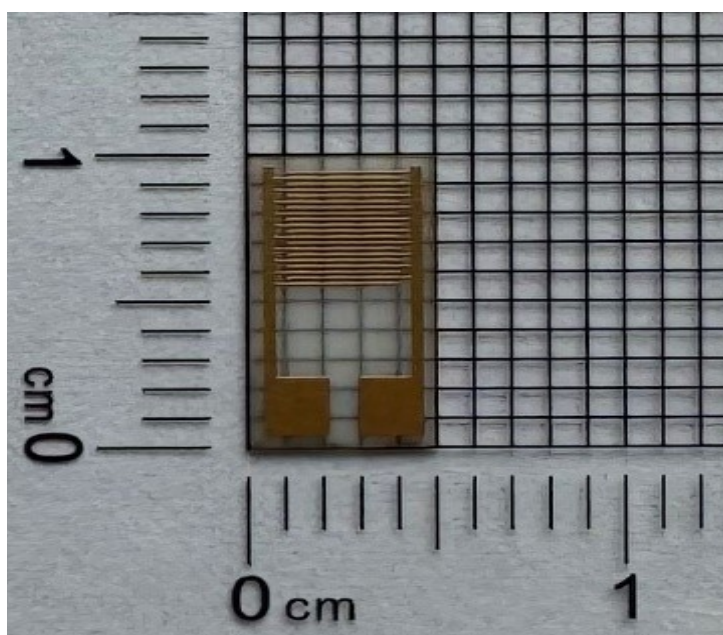

**Figure S2** Digital image of the Au interdigital electrode on PET substrate, the electrode composes of Cu/Ni/Au three layers from bottom to the top.

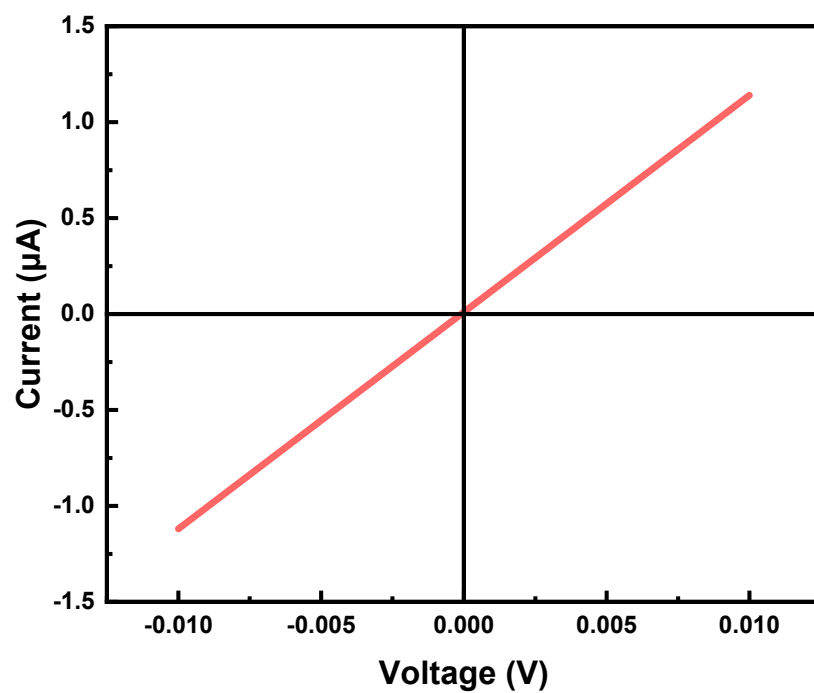

**Figure S3** I-V curve of MXene/PDMS piezoresistive sensor without pressure applied.

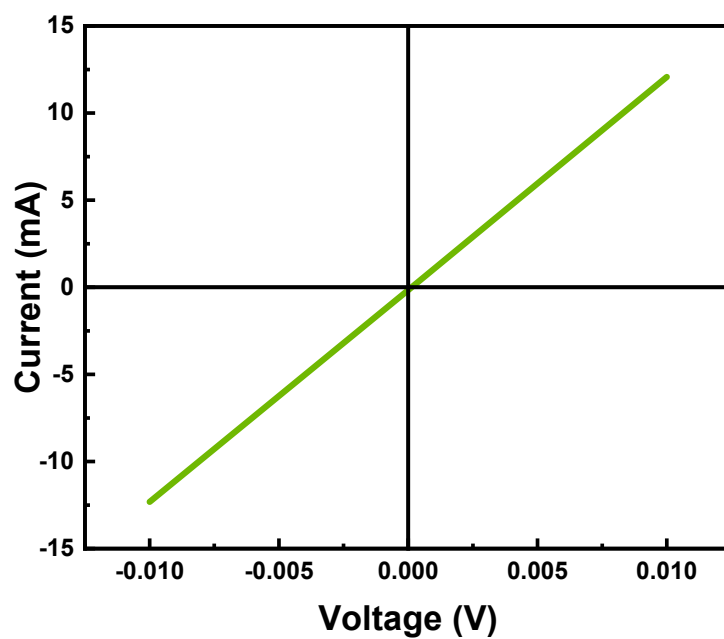

**Figure S4** I-V curve of MXene/PDMS piezoresistive sensor under the pressure of 436 kPa.

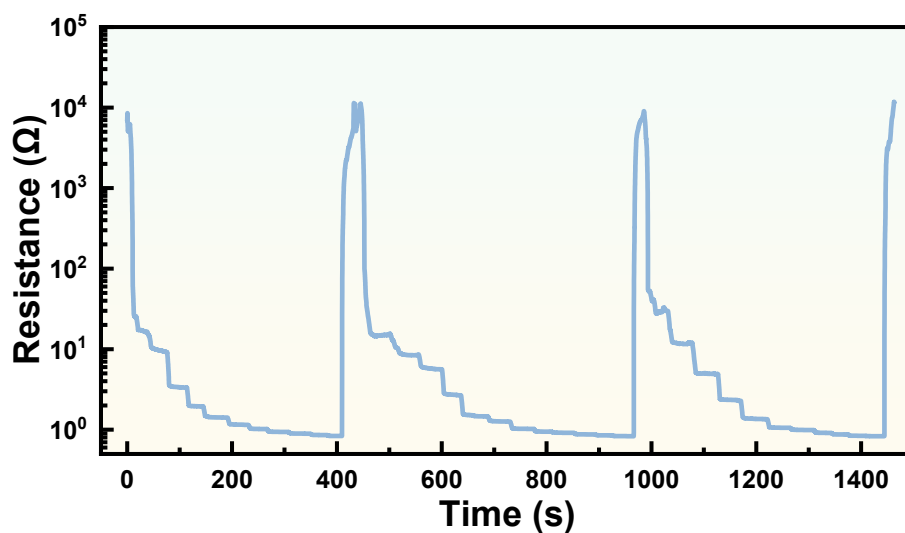

**Figure S5** Resistance change curve of MXene/PDMS piezoresistive sensor under continuous pressure applied from 0 to 436 kPa.

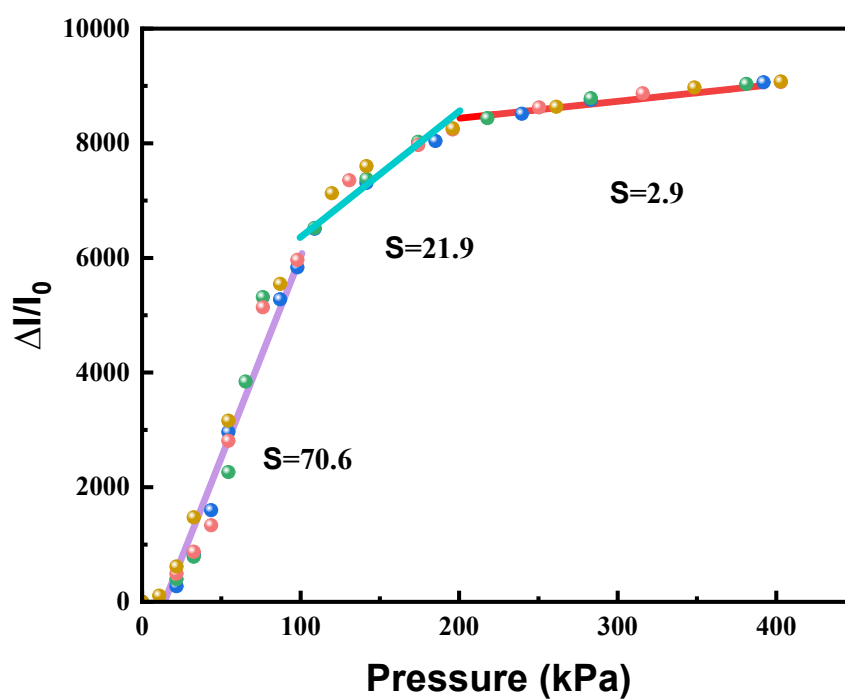

**Figure S6** Response curve of MXene/PDMS piezoresistive sensor.

|   |         |   |         |   |         |
|---|---------|---|---------|---|---------|
| A | ● —     | J | ● — — — | S | ● ● ●   |
| B | — ● ● ● | K | — ● —   | T | —       |
| C | — ● — ● | L | ● — ● ● | U | ● ● —   |
| D | — ● ●   | M | — —     | V | ● ● ● — |
| E | ●       | N | — ●     | W | ● — —   |
| F | ● ● — ● | O | — — —   | X | — ● ● — |
| G | — — ●   | P | ● — — ● | Y | — ● — — |
| H | ● ● ● ● | Q | — — ● — | Z | — — ●   |
| I | ● ●     | R | ● — ●   |   |         |

**Figure S7** International Morse code table.
